# Supplementary material for: WNK1 signalling regulates amino acid transport and mTORC1 activity to sustain acute myeloid leukaemia growth
Source: Springer Nature journal article supplement (doi:10.1038/s41467-025-59969-8), 2025-05-27
Supplement: MOESM10 [file 41467_2025_59969_MOESM10_ESM.pdf]

Reporting Summary

Nature Portfolio wishes to improve the reproducibility of the work that we publish. This form provides structure for consistency and transparency in reporting. For further information on Nature Portfolio policies, see our [Editorial Policies](#) and the [Editorial Policy Checklist](#).

Statistics

For all statistical analyses, confirm that the following items are present in the figure legend, table legend, main text, or Methods section.

|                                     |                                                                                                                                                                                                                                                                                                |
|-------------------------------------|------------------------------------------------------------------------------------------------------------------------------------------------------------------------------------------------------------------------------------------------------------------------------------------------|
| n/a                                 | Confirmed                                                                                                                                                                                                                                                                                      |
| <input type="checkbox"/>            | <input checked="" type="checkbox"/> The exact sample size ( <i>n</i> ) for each experimental group/condition, given as a discrete number and unit of measurement                                                                                                                               |
| <input type="checkbox"/>            | <input checked="" type="checkbox"/> A statement on whether measurements were taken from distinct samples or whether the same sample was measured repeatedly                                                                                                                                    |
| <input type="checkbox"/>            | <input checked="" type="checkbox"/> The statistical test(s) used AND whether they are one- or two-sided<br><i>Only common tests should be described solely by name; describe more complex techniques in the Methods section.</i>                                                               |
| <input checked="" type="checkbox"/> | <input type="checkbox"/> A description of all covariates tested                                                                                                                                                                                                                                |
| <input type="checkbox"/>            | <input checked="" type="checkbox"/> A description of any assumptions or corrections, such as tests of normality and adjustment for multiple comparisons                                                                                                                                        |
| <input type="checkbox"/>            | <input checked="" type="checkbox"/> A full description of the statistical parameters including central tendency (e.g. means) or other basic estimates (e.g. regression coefficient) AND variation (e.g. standard deviation) or associated estimates of uncertainty (e.g. confidence intervals) |
| <input type="checkbox"/>            | <input checked="" type="checkbox"/> For null hypothesis testing, the test statistic (e.g. <i>F</i> , <i>t</i> , <i>r</i> ) with confidence intervals, effect sizes, degrees of freedom and <i>P</i> value noted<br><i>Give P values as exact values whenever suitable.</i>                     |
| <input checked="" type="checkbox"/> | <input type="checkbox"/> For Bayesian analysis, information on the choice of priors and Markov chain Monte Carlo settings                                                                                                                                                                      |
| <input checked="" type="checkbox"/> | <input type="checkbox"/> For hierarchical and complex designs, identification of the appropriate level for tests and full reporting of outcomes                                                                                                                                                |
| <input checked="" type="checkbox"/> | <input type="checkbox"/> Estimates of effect sizes (e.g. Cohen's <i>d</i> , Pearson's <i>r</i> ), indicating how they were calculated                                                                                                                                                          |

Our web collection on [statistics for biologists](#) contains articles on many of the points above.

Software and code

Policy information about [availability of computer code](#)

|                 |                                                                                                                                                                                                                                                                                                                                                                                                                                                                                                                                                                                                                                                                                                                                                                          |
|-----------------|--------------------------------------------------------------------------------------------------------------------------------------------------------------------------------------------------------------------------------------------------------------------------------------------------------------------------------------------------------------------------------------------------------------------------------------------------------------------------------------------------------------------------------------------------------------------------------------------------------------------------------------------------------------------------------------------------------------------------------------------------------------------------|
| Data collection | Flow cytometry data was collected using LSRFortessa™ X-20 (BD Biosciences), BD FACSAria III (BD Biosciences), CytoFLEX LX (Beckman) ; Western blot data was collected using ChemiDoc MP Imaging System (Bio-Rad); Autoradiography data was collected using Amersham Typhoon IP Phosphor Imaging Scanner; Sequencing data was collected using Next-Seq550 (Illumina); LC-MS metabolomics data was collected using Waters Acquity H-class UPLC coupled to a Xevo TQ-S triple-quadrupole MS/MS System (Waters); Phosphoproteome data was collected using Orbitrap Fusion Lumos Tribrid Mass Spectrometer (Thermo Fisher); LC-MS data for glutamine uptake was collected using Agilent 1290 Infinity II LC system and Agilent Accurate Mass 6545 Q-TOF instrument (Agilent). |
| Data analysis   | FlowJo (v10) was used to analyze flow cytometry data; DEseq2 was used to analyse CRISPR/Cas9 screen data; GraphPad Prism software(v9) was used to perform statistical analysis. MassLynx™ and TargetLynx™ software (Waters, Manchester, UK) and the MetIDQTM software package (Biocrates Life Sciences AG) were used to performed LC-MS metabolomics data analysis. Proteome Discoverer software (v3.1), R, MSstatsTMT and clusterProfiler were used to analyse phosphoproteome data; Agilent Profinder software (version B.8.0.00 service pack 3) was used to analyse LC-MS data for glutamine uptake.                                                                                                                                                                  |

For manuscripts utilizing custom algorithms or software that are central to the research but not yet described in published literature, software must be made available to editors and reviewers. We strongly encourage code deposition in a community repository (e.g. GitHub). See the Nature Portfolio [guidelines for submitting code & software](#) for further information.

## Data

Policy information about [availability of data](#)

All manuscripts must include a [data availability statement](#). This statement should provide the following information, where applicable:

- Accession codes, unique identifiers, or web links for publicly available datasets
- A description of any restrictions on data availability
- For clinical datasets or third party data, please ensure that the statement adheres to our [policy](#)

Proteomics data are available via ProteomeXchange with identifier PXD041902. Source data are provided with this paper

## Research involving human participants, their data, or biological material

Policy information about studies with [human participants or human data](#). See also policy information about [sex, gender \(identity/presentation\), and sexual orientation](#) and [race, ethnicity and racism](#).

|                                                                    |                                                                                                                                                                                                                                                                                                                                                                    |
|--------------------------------------------------------------------|--------------------------------------------------------------------------------------------------------------------------------------------------------------------------------------------------------------------------------------------------------------------------------------------------------------------------------------------------------------------|
| Reporting on sex and gender                                        | Reporting on sex and gender was summarized in Supplementary Table 1                                                                                                                                                                                                                                                                                                |
| Reporting on race, ethnicity, or other socially relevant groupings | NA                                                                                                                                                                                                                                                                                                                                                                 |
| Population characteristics                                         | Population characteristics were summarized in Supplementary Table 1                                                                                                                                                                                                                                                                                                |
| Recruitment                                                        | N/A                                                                                                                                                                                                                                                                                                                                                                |
| Ethics oversight                                                   | Primary human AML samples were obtained from the Barts Cancer Institute Biobank (Reference number: BCITB-SD-[CID]-1488434). All samples were collected and studied following informed consent and approval by the Barts Cancer Institute Ethical Committees and the BCI Tissue Biobank's scientific sub-committee, in compliance with the Declaration of Helsinki. |

Note that full information on the approval of the study protocol must also be provided in the manuscript.

## Field-specific reporting

Please select the one below that is the best fit for your research. If you are not sure, read the appropriate sections before making your selection.

☒ Life sciences ☐ Behavioural & social sciences ☐ Ecological, evolutionary & environmental sciences

For a reference copy of the document with all sections, see [nature.com/documents/nr-reporting-summary-flat.pdf](https://www.nature.com/documents/nr-reporting-summary-flat.pdf)

## Life sciences study design

All studies must disclose on these points even when the disclosure is negative.

|                 |                                                                                                                                                                                                                                                    |
|-----------------|----------------------------------------------------------------------------------------------------------------------------------------------------------------------------------------------------------------------------------------------------|
| Sample size     | The number of mice assigned to each treatment arm was selected to provide sufficient statistical power to discern significant differences. For all other experiments, a sample size of at least n=3 was chosen to ensure statistical significance. |
| Data exclusions | No data exclusions were made in this study.                                                                                                                                                                                                        |
| Replication     | The stated number of replicates for each experiment can be found in the figure legends.                                                                                                                                                            |
| Randomization   | Mice were randomized into groups, accounting for age and sex factors.                                                                                                                                                                              |
| Blinding        | The researchers were not blinded to the experiments, and the results were obtained using objective quantitative methods.                                                                                                                           |

## Reporting for specific materials, systems and methods

We require information from authors about some types of materials, experimental systems and methods used in many studies. Here, indicate whether each material, system or method listed is relevant to your study. If you are not sure if a list item applies to your research, read the appropriate section before selecting a response.

## Materials &amp; experimental systems

|                                     |                                                                 |
|-------------------------------------|-----------------------------------------------------------------|
| n/a                                 | Involved in the study                                           |
| <input type="checkbox"/>            | <input checked="" type="checkbox"/> Antibodies                  |
| <input type="checkbox"/>            | <input checked="" type="checkbox"/> Eukaryotic cell lines       |
| <input checked="" type="checkbox"/> | <input type="checkbox"/> Palaeontology and archaeology          |
| <input type="checkbox"/>            | <input checked="" type="checkbox"/> Animals and other organisms |
| <input checked="" type="checkbox"/> | <input type="checkbox"/> Clinical data                          |
| <input checked="" type="checkbox"/> | <input type="checkbox"/> Dual use research of concern           |
| <input checked="" type="checkbox"/> | <input type="checkbox"/> Plants                                 |

## Methods

|                                     |                                                    |
|-------------------------------------|----------------------------------------------------|
| n/a                                 | Involved in the study                              |
| <input checked="" type="checkbox"/> | <input type="checkbox"/> ChIP-seq                  |
| <input type="checkbox"/>            | <input checked="" type="checkbox"/> Flow cytometry |
| <input checked="" type="checkbox"/> | <input type="checkbox"/> MRI-based neuroimaging    |

## Antibodies

## Antibodies used

SPAK, Cell Signaling, 2281s, WB, 1:1000  
 OSR1, Cell Signaling, 3729s, WB, 1:1000  
 WNK1, Cell Signaling, 4979s, WB, 1:1000  
 Vinculin, Sigma, hVIN-1, WB, 1:10000  
 $\beta$ -Actin, Abcam, ab6276, WB, 1:10000  
 HA-tag, Cell Signaling, 3724s, WB, 1:5000  
 phospho-SPAK (Ser373)/phospho-OSR1 (Ser325), Merck Millipore, 07-2273, WB, 1:1000  
 Goat Anti-Rabbit IgG -HRP, Vector Laboratories, PI-1000, WB, 1:5000  
 Horse Anti-Mouse IgG -HRP, Vector Laboratories, PI-2000, WB, 1:5000  
 Phospho-Akt (Ser473), Cell Signaling, 9271S, WB, 1:1000  
 Phospho-Akt (Thr308), Cell Signaling, 9275S, WB, 1:1000  
 Akt (pan) (C67E7), Cell Signaling, 4691S, WB, 1:1000  
 Anti-V5 Agarose Affinity Gel, Sigma, A7345-1ML, IP  
 V5 Tag, Sigma, V8012-50UG, WB, 1:5000  
 Phospho-4E-BP1 (Thr37/46), Cell Signaling, 2855S, WB, 1:1000  
 4E-BP1 (53H11), Cell Signaling, 9644S, WB, 1:1000  
 Phospho-p70 S6 Kinase (Thr389), Cell Signaling, 9234S, WB, 1:1000  
 p70 S6 Kinase (49D7), Cell Signaling, 2708S, WB, 1:1000  
 4E-BP2 Antibody, Cell Signaling, 2845S, WB, 1:1000  
 eIF4EBP1 + eIF4EBP2 + eIF4EBP3 (phospho T45), Abcam, ab68187, WB, 1:1000  
 Pierce™ Anti-HA Magnetic Beads, Thermo Fisher Scientific, 88836, IP  
 Phospho-AMPK $\alpha$ , Cell Signaling, 50081S, WB, 1:1000  
 AMPK $\alpha$  (D5A2), Cell Signaling, 5831, WB, 1:1000  
 Phospho-ULK1 (Ser555) (D1H4), Cell Signaling, 5869, WB, 1:1000  
 ULK1 (D8H5), Cell Signaling, 8054, WB, 1:1000  
 Beclin-1 (D40C5), Cell Signaling, 3495, WB, 1:1000  
 Phospho-Becclin-1 (Ser93) (D9A5G), Cell Signaling, 14717, WB, 1:1000  
 Phospho-GSK-3 $\beta$  (Ser9) (D85E12), Cell Signaling, 5558, WB, 1:1000  
 NPRL2 (D8K3X), Cell Signaling, 37344, WB, 1:1000  
 PRAS40 (D23C7), Cell Signaling, 2691T, WB, 1:1000  
 CD117, Miltenyi Biotec, 130-091-224, MACS  
 FITC anti-human CD19 Antibody, BIOLEGEN, FACS, 1:100  
 PE/Cyanine7 anti-human CD33 Antibody, BIOLEGEN, FACS, 1:100  
 PE/Cyanine5 anti-human CD3 Antibody, BIOLEGEN, FACS, 1:100  
 APC anti-human CD45 Antibody, BIOLEGEN, FACS, 1:100

## Validation

All antibodies used in this study were validated and purchased from commercial vendors. They were utilized in accordance with the manufacturer's instructions.

## Eukaryotic cell lines

Policy information about [cell lines and Sex and Gender in Research](#)

## Cell line source(s)

MA9 leukaemia cell lines were generated in house;  
 THP1, NOMO1, MOLM13, MV4-11, MonoMac6, U937, MOLM16 cell lines were obtained from DSMZ;  
 BJ-Tert, H226, MM1S cell lines were obtained from ATCC.

## Authentication

No cell authentication was performed

## Mycoplasma contamination

Cell were routinely checked for Mycoplasma contamination via PCR and tested negative

Commonly misidentified lines  
(See [ICLAC](#) register)

No commonly misidentified cell lines were used.

## Animals and other research organisms

Policy information about [studies involving animals](#); [ARRIVE guidelines](#) recommended for reporting animal research, and [Sex and Gender in Research](#)

|                         |                                                                                                                                                                                                                                                                                                     |
|-------------------------|-----------------------------------------------------------------------------------------------------------------------------------------------------------------------------------------------------------------------------------------------------------------------------------------------------|
| Laboratory animals      | C57BL/6 and B6.SJL female mice (6–8 weeks old) were used for Wnk1fl/+, Wnk1fl/–, Wnk1fl/D368A MA9 leukaemia cells bone marrow transplantation. For human primary AML xenotransplantation, eight- to ten-week-old NOD.Cg-KitW-41JTy <sup>+</sup> Prkdcscid Il2rgtm1Wjl/ThomJ (NBSGW) mice were used. |
| Wild animals            | This study did not include the use of wild animals.                                                                                                                                                                                                                                                 |
| Reporting on sex        | Sex was not taken into consideration in the current study.                                                                                                                                                                                                                                          |
| Field-collected samples | No field-collected samples were used in the current study.                                                                                                                                                                                                                                          |
| Ethics oversight        | All mouse experiments conducted in Denmark were approved by the Danish Animal Ethics Committee under license number 2017-15-0201-01176. All mouse experiments carried out in the UK were approved by the Animals in Science Regulation Unit (license number: PP5781054).                            |

Note that full information on the approval of the study protocol must also be provided in the manuscript.

## Flow Cytometry

### Plots

Confirm that:

- ☒ The axis labels state the marker and fluorochrome used (e.g. CD4-FITC).
- ☒ The axis scales are clearly visible. Include numbers along axes only for bottom left plot of group (a 'group' is an analysis of identical markers).
- ☒ All plots are contour plots with outliers or pseudocolor plots.
- ☒ A numerical value for number of cells or percentage (with statistics) is provided.

### Methodology

|                           |                                                                                                                                                                                                               |
|---------------------------|---------------------------------------------------------------------------------------------------------------------------------------------------------------------------------------------------------------|
| Sample preparation        | Cultured cell lines                                                                                                                                                                                           |
| Instrument                | LSRFortessa™ X-20 (BD Biosciences), BD FACSAria III (BD Biosciences), CytoFLEX LX (Beckman)                                                                                                                   |
| Software                  | FlowJo (v10)                                                                                                                                                                                                  |
| Cell population abundance | N/A                                                                                                                                                                                                           |
| Gating strategy           | FSC-A and FSC-H was used to identify single cells; Cells were separated by viability using DAPI exclusion and AnnexinV for apoptosis assay; Cells were separated by GFP or RFP for growth competition assays. |

- ☒ Tick this box to confirm that a figure exemplifying the gating strategy is provided in the Supplementary Information.
